# Supplementary material
Source: PubMed Central journal article supplement (PMC6303467)
Supplement: noy123_suppl_supplementary_fig3.pdf [file noy123_suppl_supplementary_fig3.pdf]

**A**

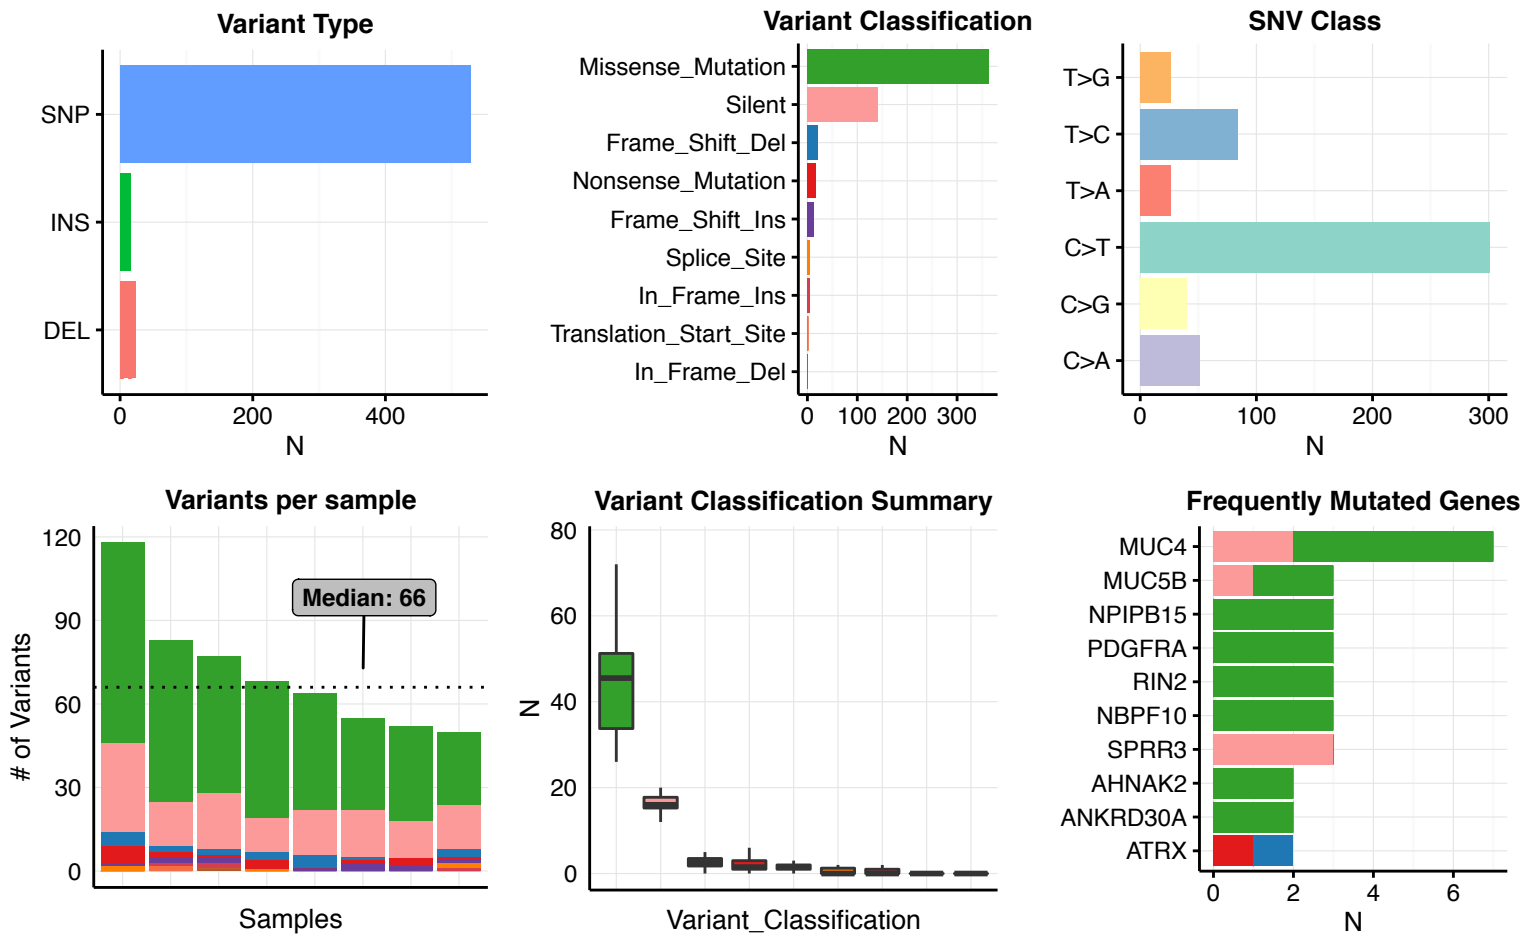

**B**

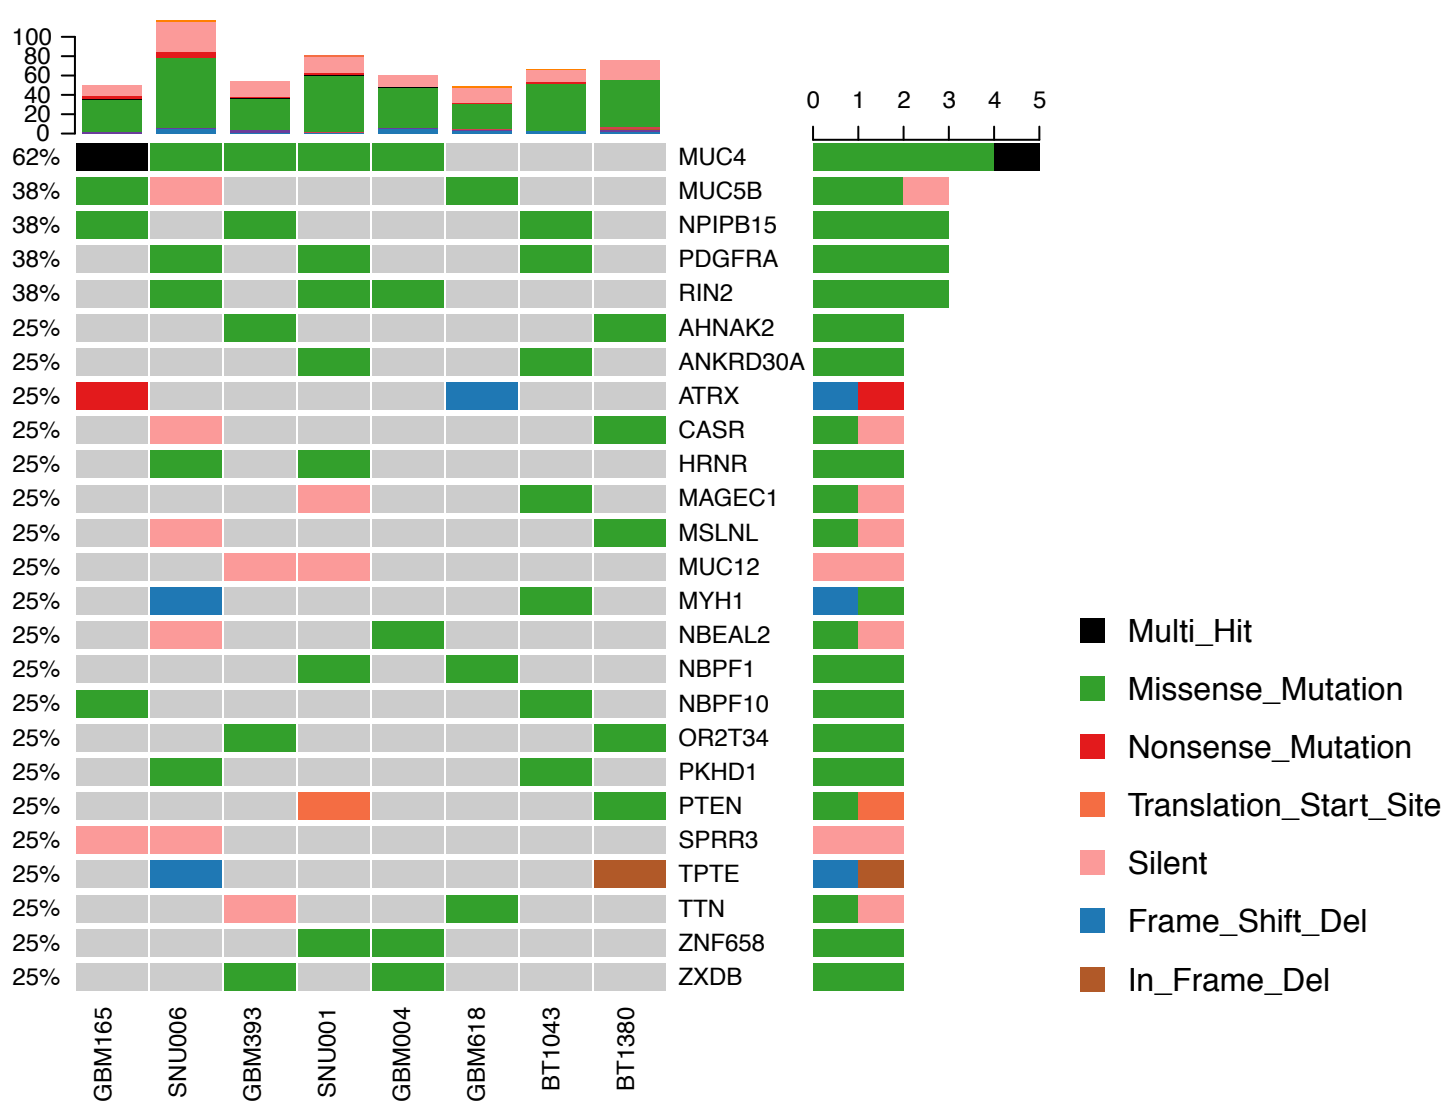

- Multi\_Hit
- Missense\_Mutation
- Nonsense\_Mutation
- Translation\_Start\_Site
- Silent
- Frame\_Shift\_Del
- In\_Frame\_Del
