# Supplementary material
Source: PubMed Central journal article supplement (PMC6303467)

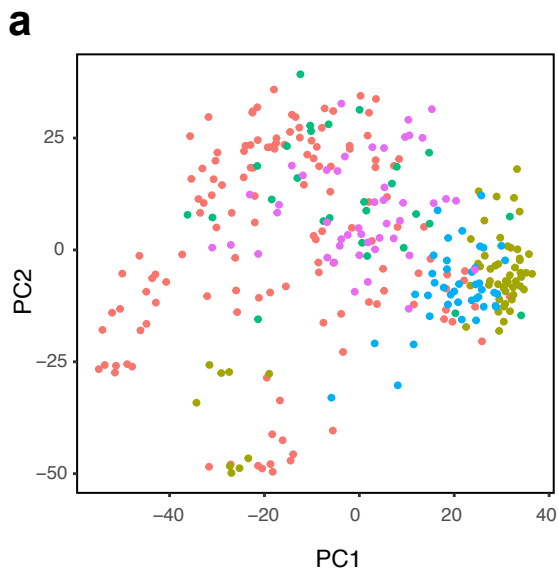

● Griesinger ● Lambert  
● Schwartzentruber ● Sharma ● Sturm

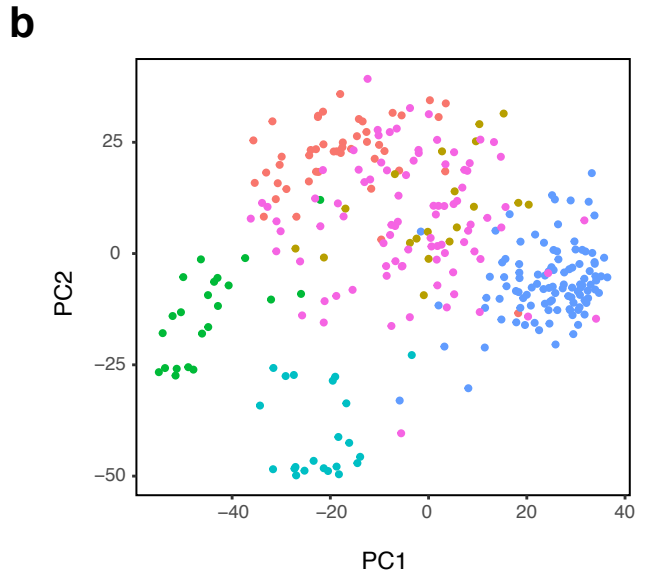

● Ependymoma ● Medulloblastoma ● Pilocytic astrocytoma  
● Glioblastoma ● Normal ● Pediatric glioblastoma

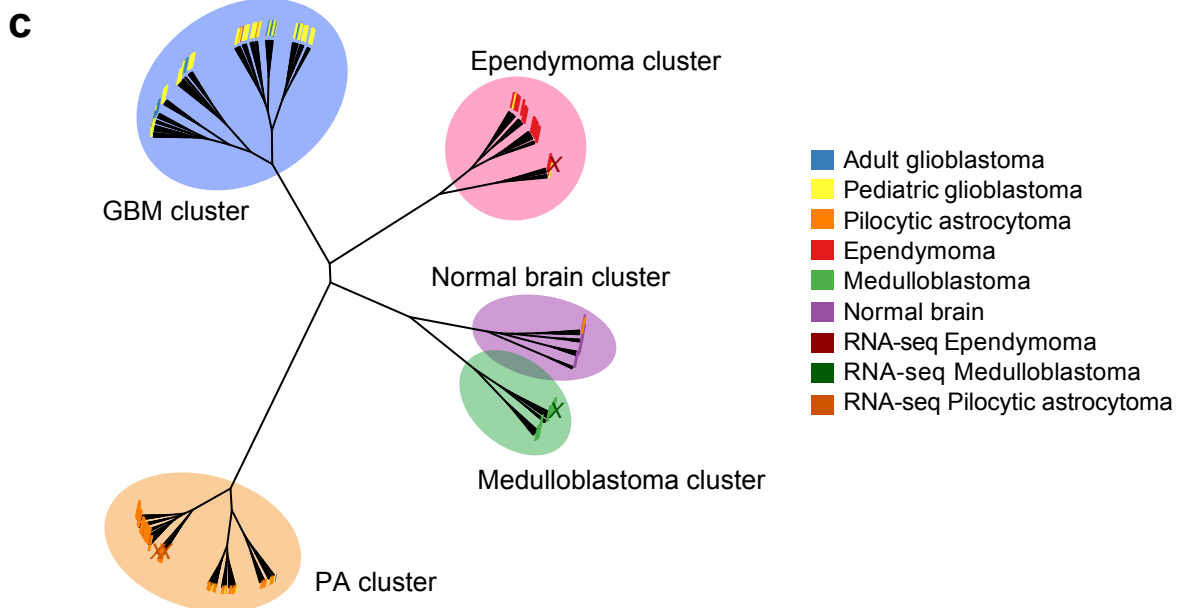

Supplement: noy123_suppl_supplementary_fig7.pdf [file noy123_suppl_supplementary_fig7.pdf]
