# Supplementary material
Source: PubMed Central journal article supplement (PMC6303467)

S0766510 - chr4:55133847 C>G, PDGFRA L354V, MAF: 930/2021 (0.46)

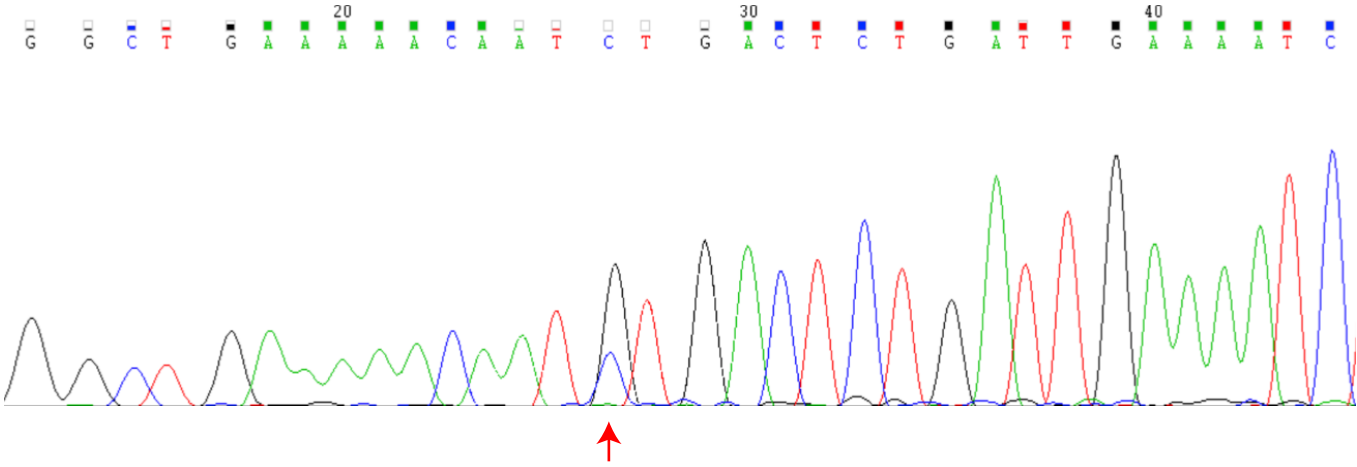

S1304451 - chr8:38272308 A>G, FGFR1 K687E, MAF: 91/157 (0.58)

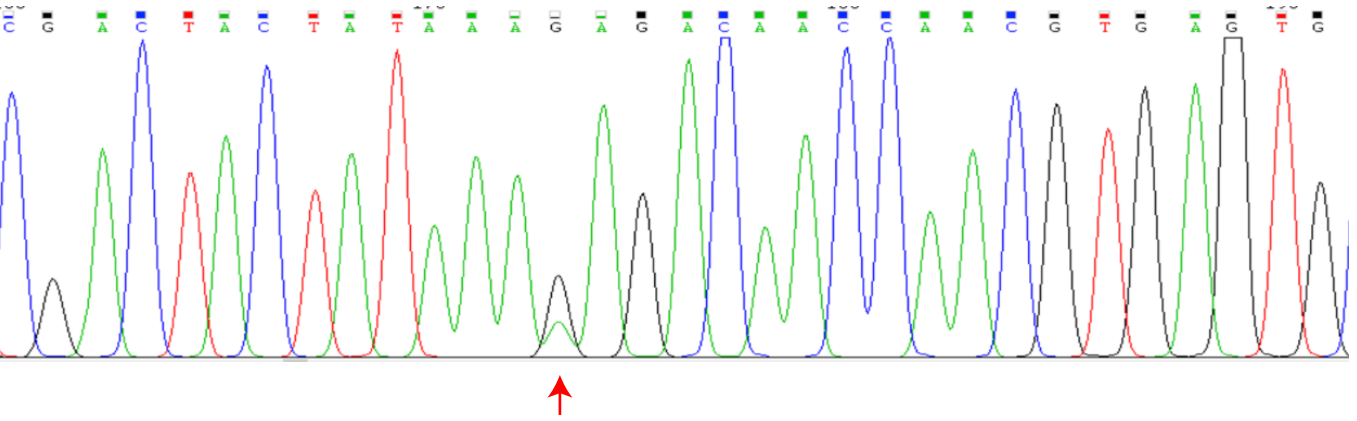

Supplement: noy123_suppl_supplementary_fig1.pdf [file noy123_suppl_supplementary_fig1.pdf]

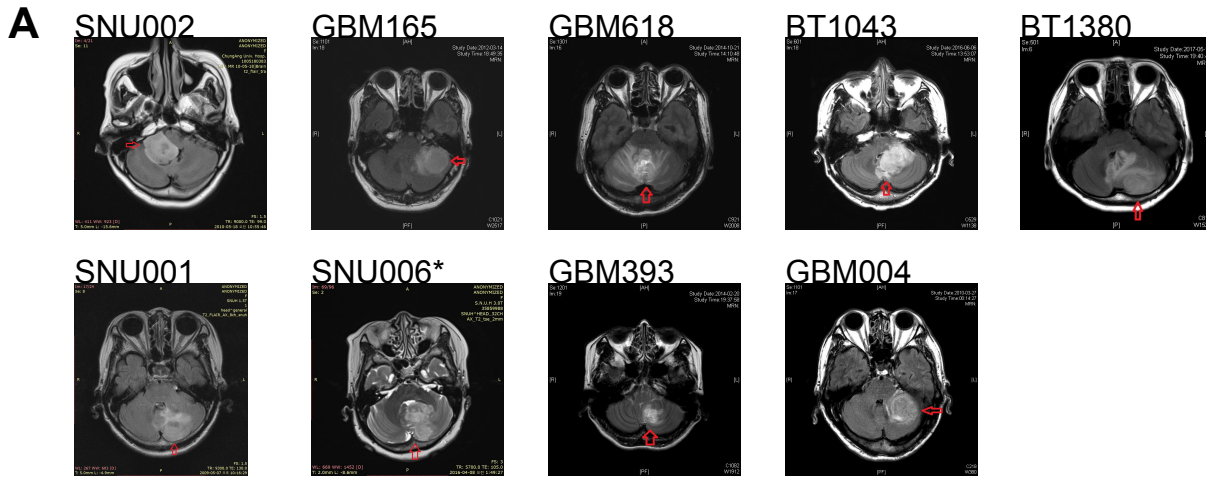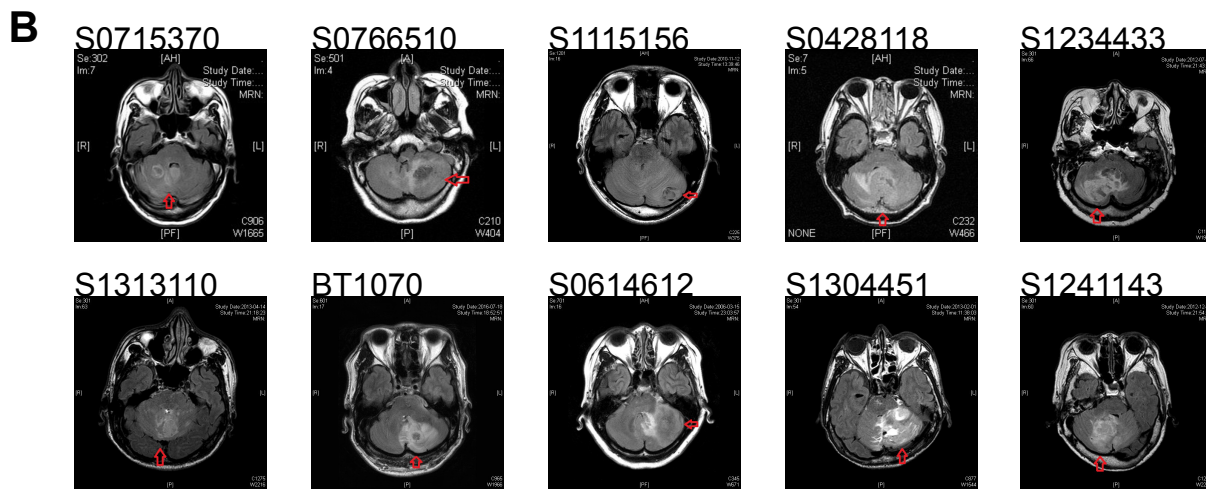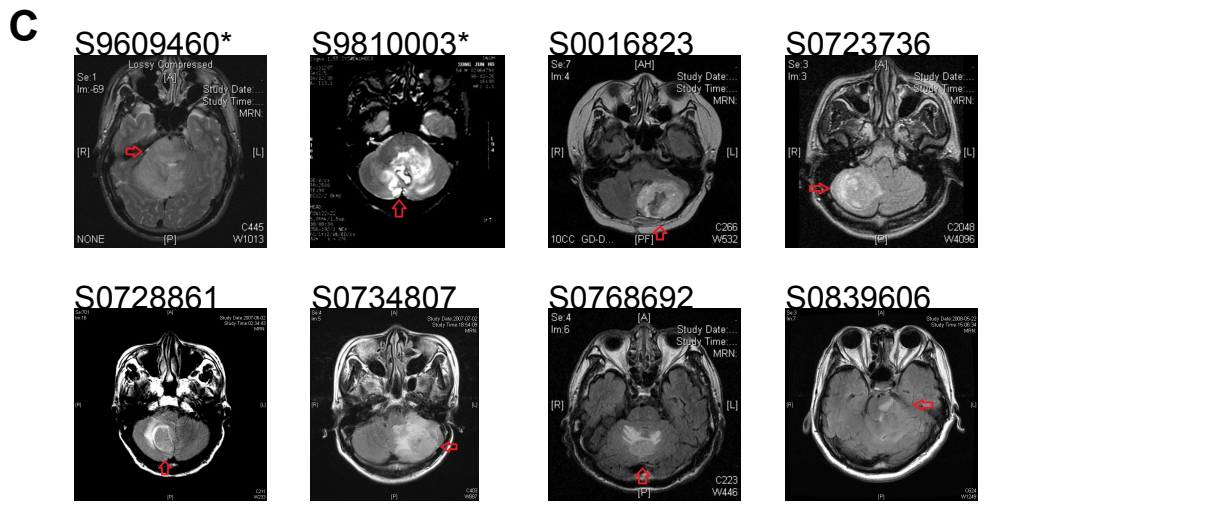

\* indicates T2 image

Supplement: noy123_suppl_supplementary_fig2.pdf [file noy123_suppl_supplementary_fig2.pdf]

**A**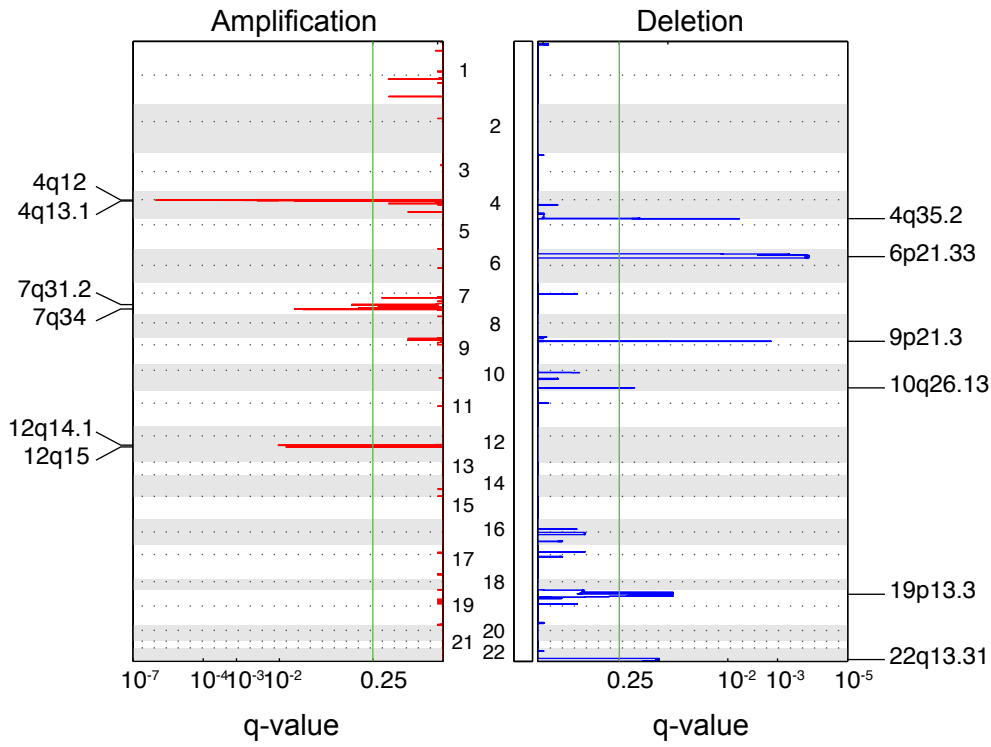**B**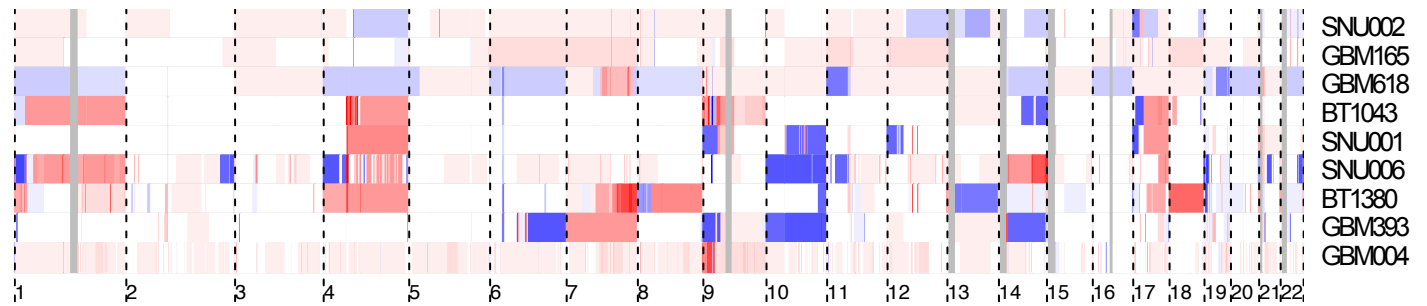**C**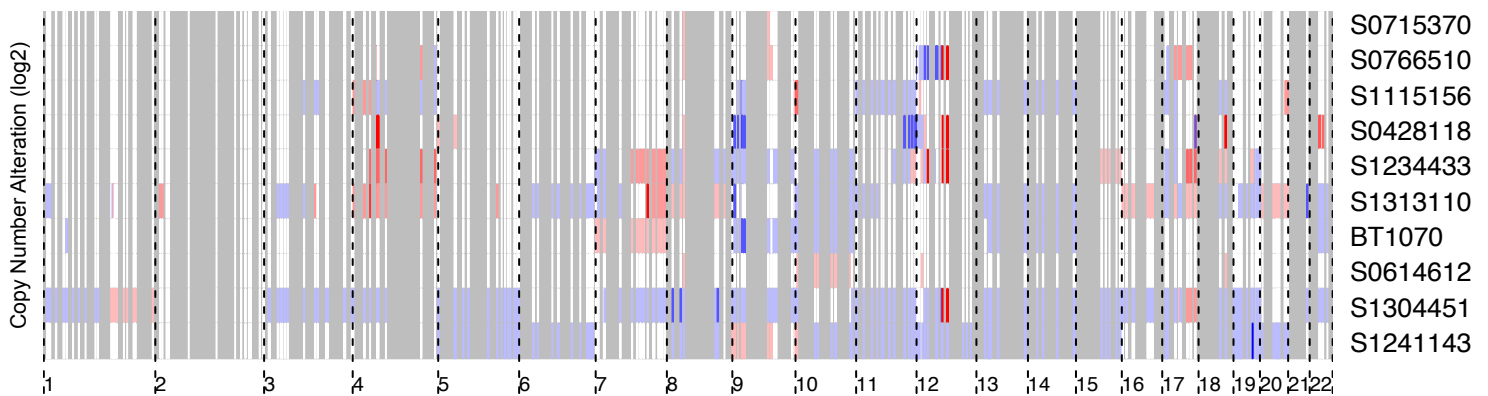**D**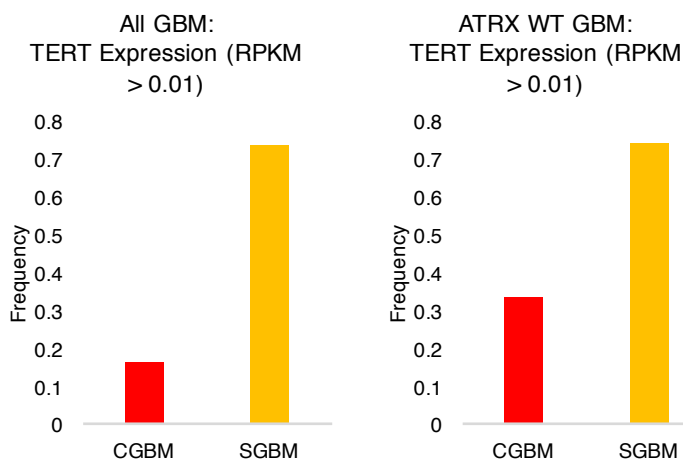

Supplement: noy123_suppl_supplementary_fig4.pdf [file noy123_suppl_supplementary_fig4.pdf]

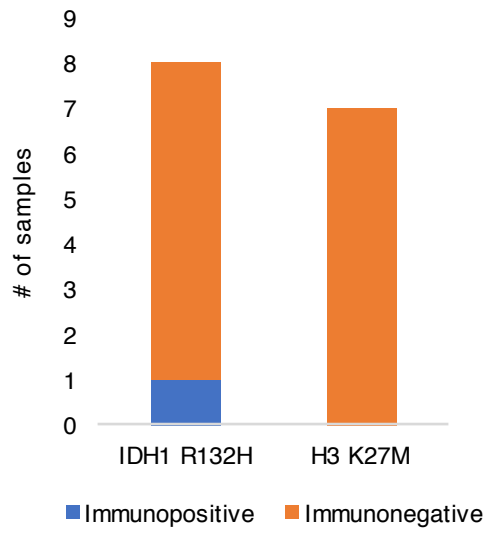

Supplement: noy123_suppl_supplementary_fig5.pdf [file noy123_suppl_supplementary_fig5.pdf]

**a**

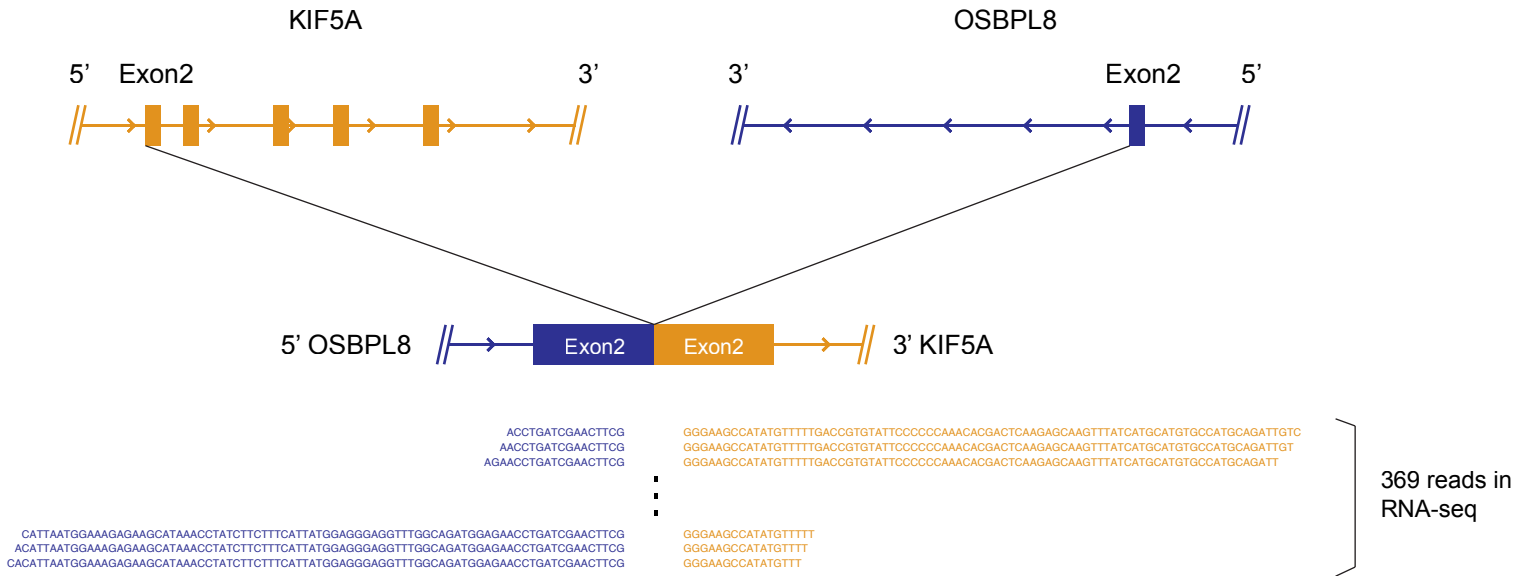

**b**

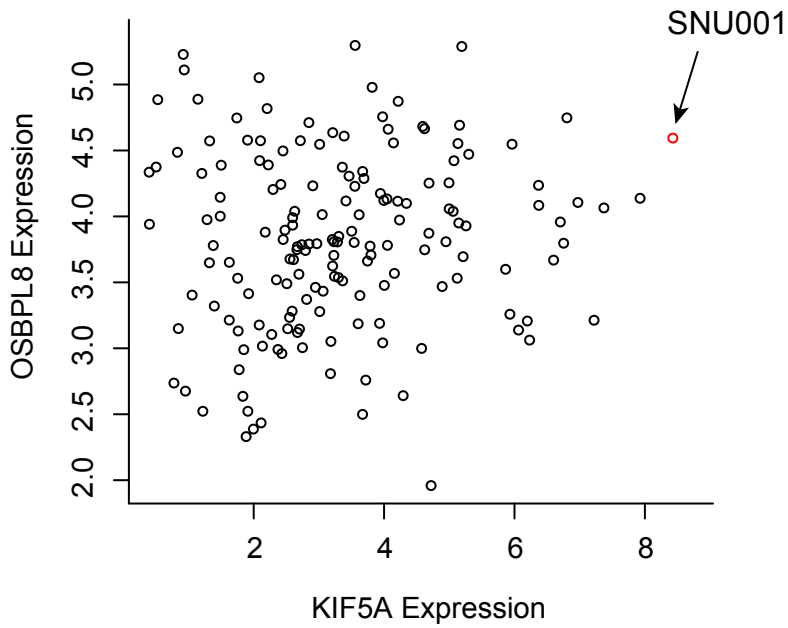

**c**

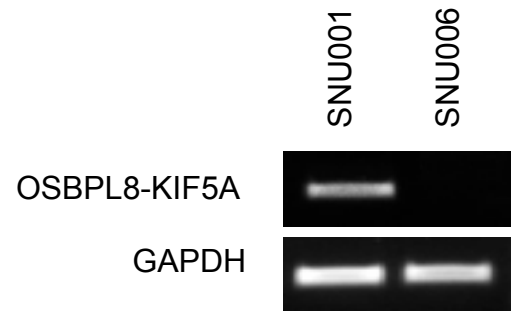

Supplement: noy123_suppl_supplementary_fig6.pdf [file noy123_suppl_supplementary_fig6.pdf]

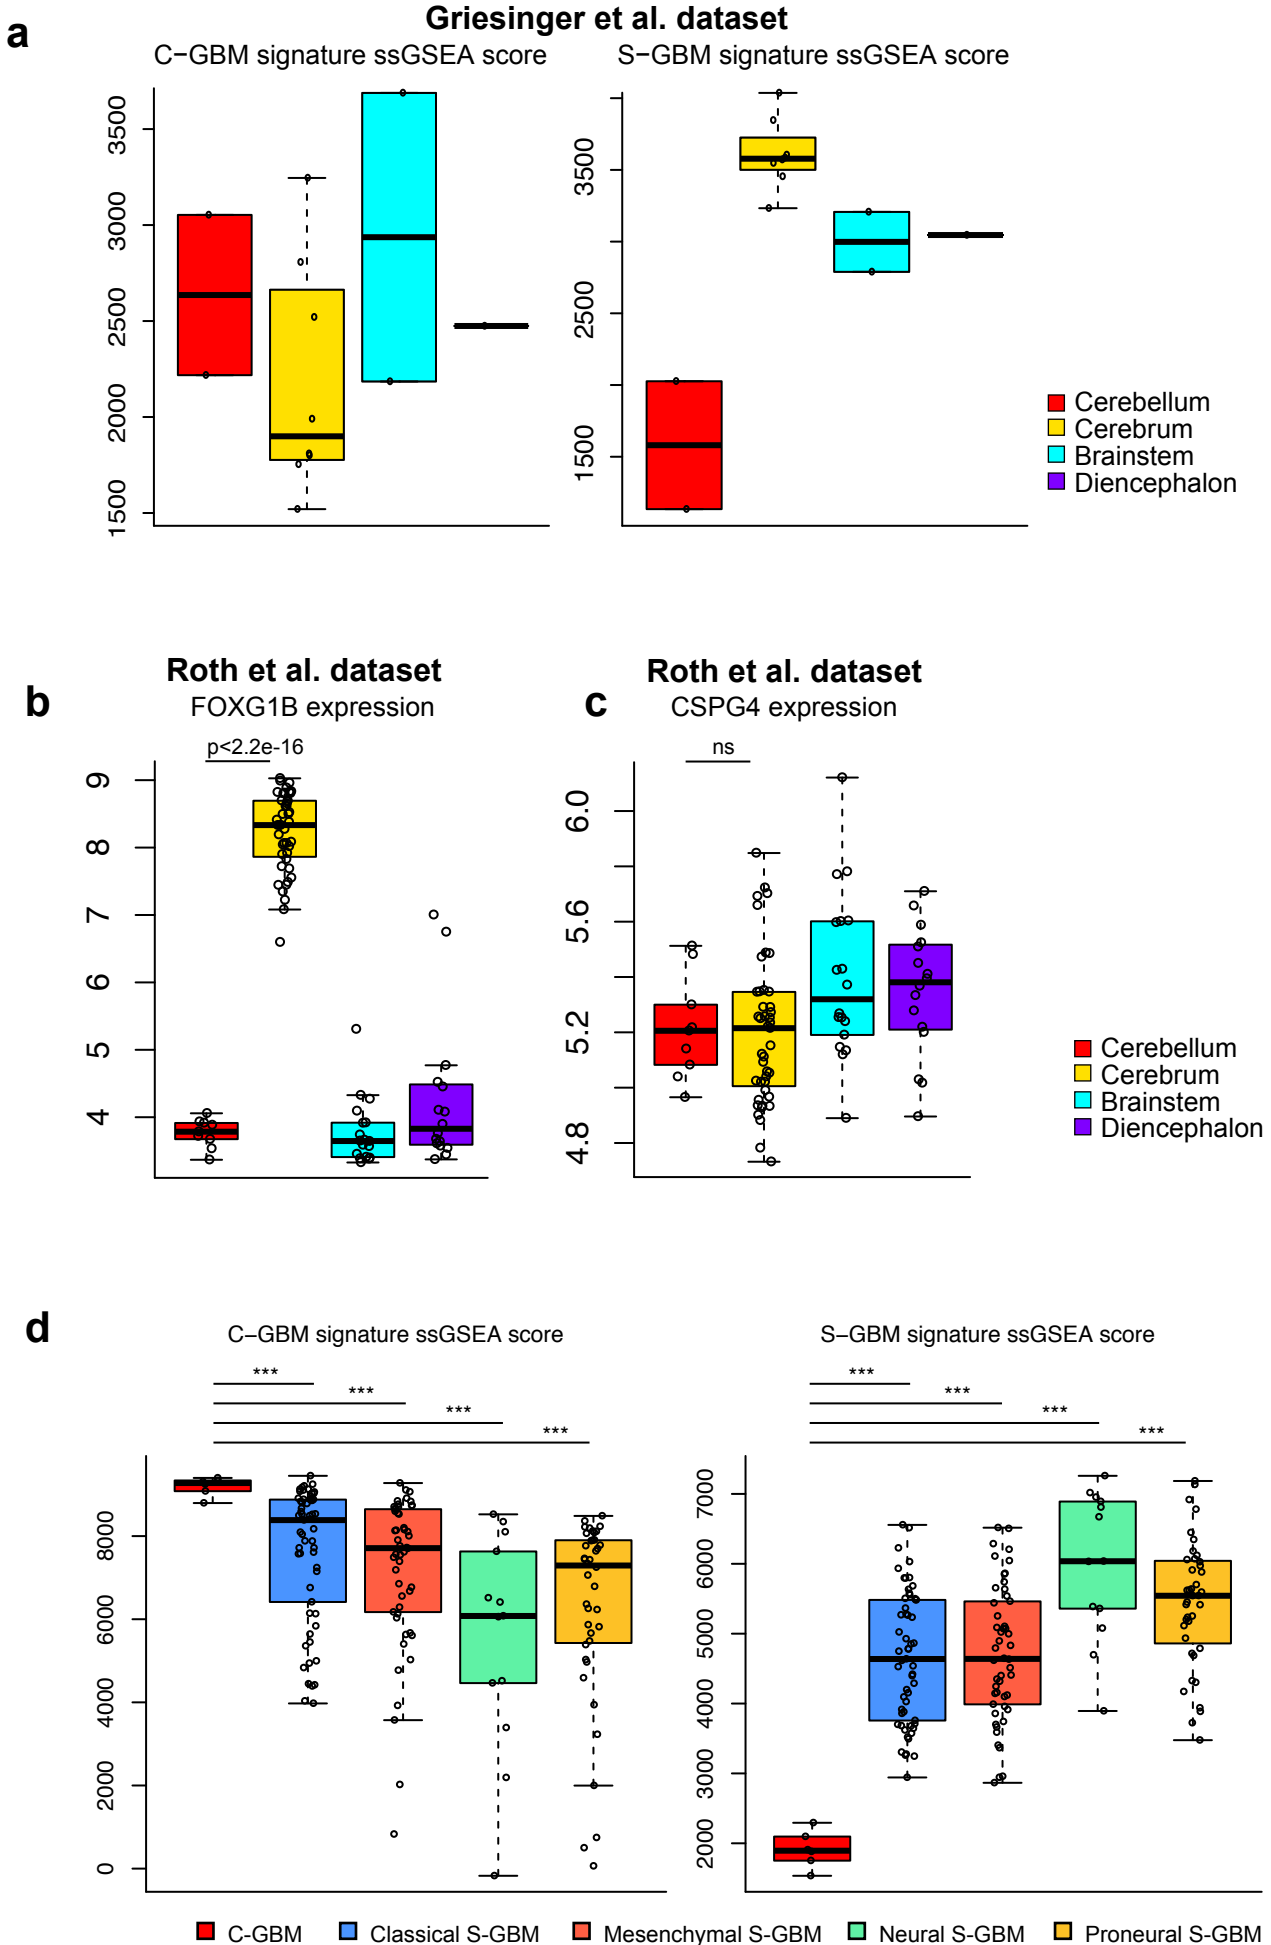

Supplement: noy123_suppl_supplementary_fig8.pdf [file noy123_suppl_supplementary_fig8.pdf]
